# Supplementary material for: Piperine suppresses the Wnt/β-catenin pathway and has anti-cancer effects on colorectal cancer cells
Source: PubMed Central journal article supplement (PMC7363889; doi:10.1038/s41598-020-68574-2), 2020-07-15
Supplement: 41598_2020_68574_MOESM1_ESM.pdf [file 41598_2020_68574_MOESM1_ESM.pdf]

## Supplementary Info File

Title: Piperine suppresses the Wnt/ $\beta$ -catenin pathway and has anti-cancer effects on colorectal cancer cells

Authors: Gracielle C. de Almeida<sup>1</sup>, Luiz F. S. Oliveira<sup>1</sup>, Danilo Predes<sup>1</sup>, Harold H. Fokoue<sup>2,3</sup>, Ricardo M. Kuster<sup>4</sup>, Felipe L. Oliveira<sup>1</sup>, Fabio A. Mendes<sup>1\*</sup>, Jose G. Abreu<sup>1\*</sup>.

Affiliations: <sup>1</sup> Instituto de Ciências Biomédicas, Programa de Biologia Celular e do Desenvolvimento, Universidade Federal do Rio de Janeiro, Rio de Janeiro, RJ, Brazil; <sup>2</sup> Instituto Nacional de Ciência e Tecnologia de Fármacos e Medicamentos (INCT-INOVAR; <http://www.inct-inovar.ccs.ufrj.br/>), Laboratório de Avaliação e Síntese de Substâncias Bioativas (LASSBio®, <http://www.lassbio.icb.ufrj.br>) Universidade Federal do Rio de Janeiro, CCS, Cidade Universitária, Rio de Janeiro, RJ, Brazil. <sup>3</sup> Programa de Pós-Graduação em Farmacologia e Química Medicinal, Instituto de Ciências Biomédicas, Universidade Federal do Rio de Janeiro, Avenida Carlos Chagas Filho, 373, Ilha do Fundão, 21941-912, Rio de Janeiro, RJ, Brazil. <sup>4</sup> Instituto de Pesquisas em Produtos Naturais, Universidade Federal do Rio de Janeiro, Rio de Janeiro, Brazil.

Correspondence to: Fabio A. Mendes, [mendes@icb.ufrj.br](mailto:mendes@icb.ufrj.br) and Jose G. Abreu, [garciajr@icb.ufrj.br](mailto:garciajr@icb.ufrj.br)

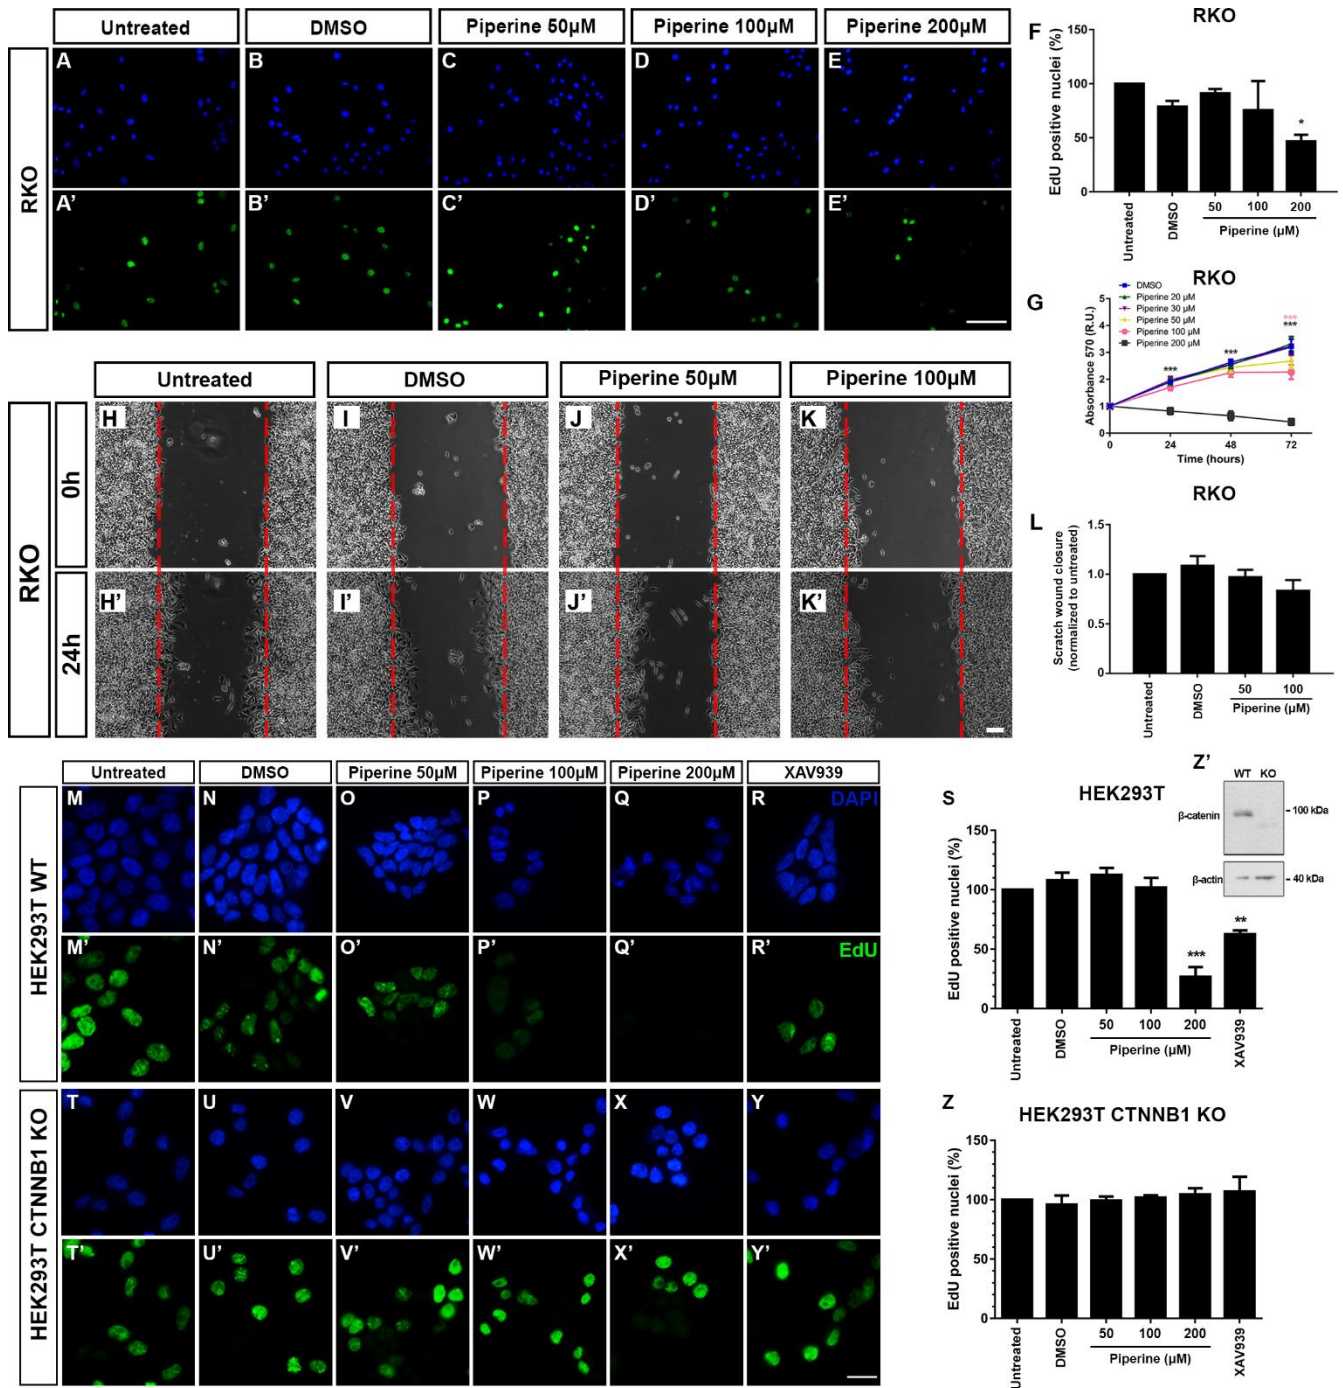

**Supplementary Figure S1. Piperine has less effect on a colorectal cell line without overactive Wnt signaling.**

(A-F) Click-iT EdU assay of RKO cells untreated or treated with DMSO, 50, 100 or 200  $\mu$ M piperine. Scale bar = 50  $\mu$ m (F) Graph shows that 200  $\mu$ M piperine has effect on RKO cell lines proliferation. (G) MTT assay shows that RKO cells has reduced viability after piperine treatment. (H-L) Scratch assay of RKO cells untreated or treated with DMSO, 50, 100  $\mu$ M piperine. Scale bar = 140  $\mu$ m. (L) Graph shows that piperine has no effect on RKO cells migration after 24h treatment. (M-S) Click-iT EdU assay of HEK293T cell line untreated or treated with DMSO, 50,

100 or 200  $\mu$ M piperine. (T-Z) Click-iT EdU assay of HEK293T CTNNB1 KO cell line untreated or treated with DMSO, 50, 100 or 200  $\mu$ M piperine. Scale bar = 20  $\mu$ m (Z') Western blot assay showing absence of  $\beta$ -catenin band after CRISPR mediated knockout. Graphs shows mean and SEM. \* $p$ <0.05, \*\* $p$ <0.01, \*\*\* $p$ <0.001.

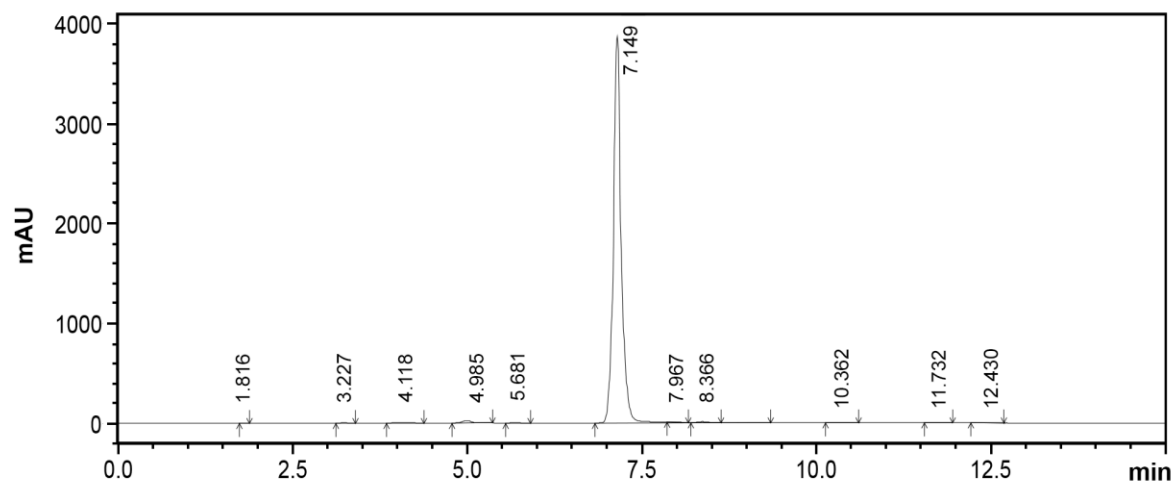

**Supplementary Figure S2: Piperine HPLC analysis.**

Data: UVvis ( $\lambda_{\max}$ ) = 345 nm , Retention time: 7.149 min; purity: 98.79%. (Mobile phase: Acetonitrile: 60% / Water: 40%).

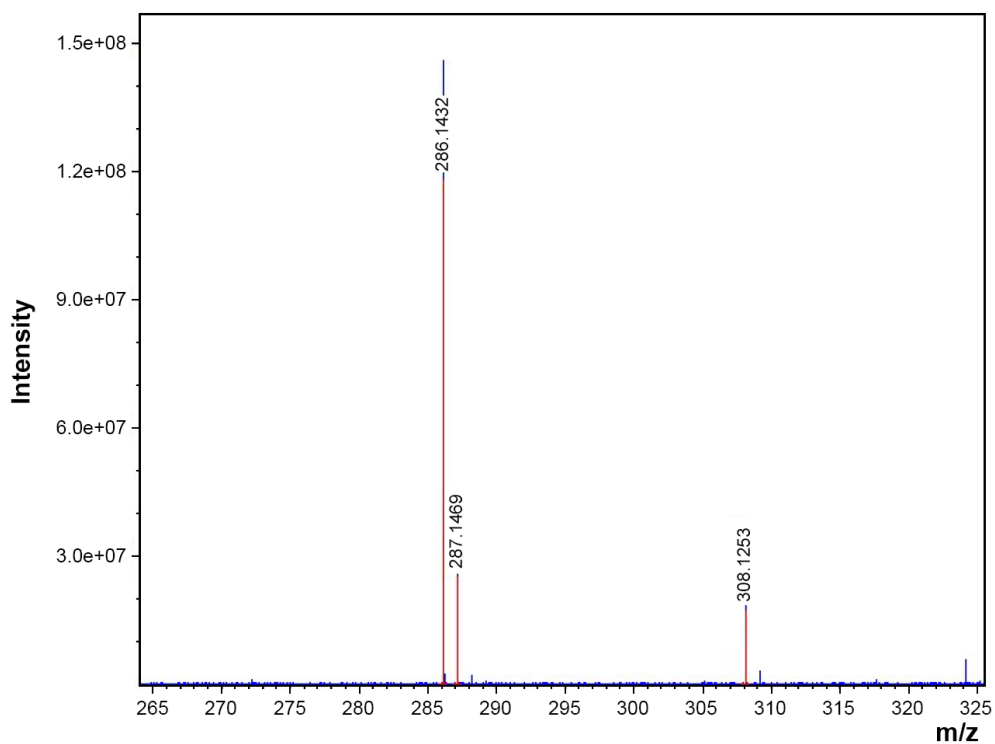

**Supplementary Figure S3: Piperine high resolution electrospray ionization mass spectrometry analysis.**

HRESIMS: m/z calculated for  $C_{17}H_{21}NO_3 + [M+H]^+$  = 286.1438; found = 286.1432. m/z calculated for  $C_{17}H_{21}NNaO_3 + [M+Na]^+$  = 308.1257; found = 308.1253. m/z: Mass to charge ratio.

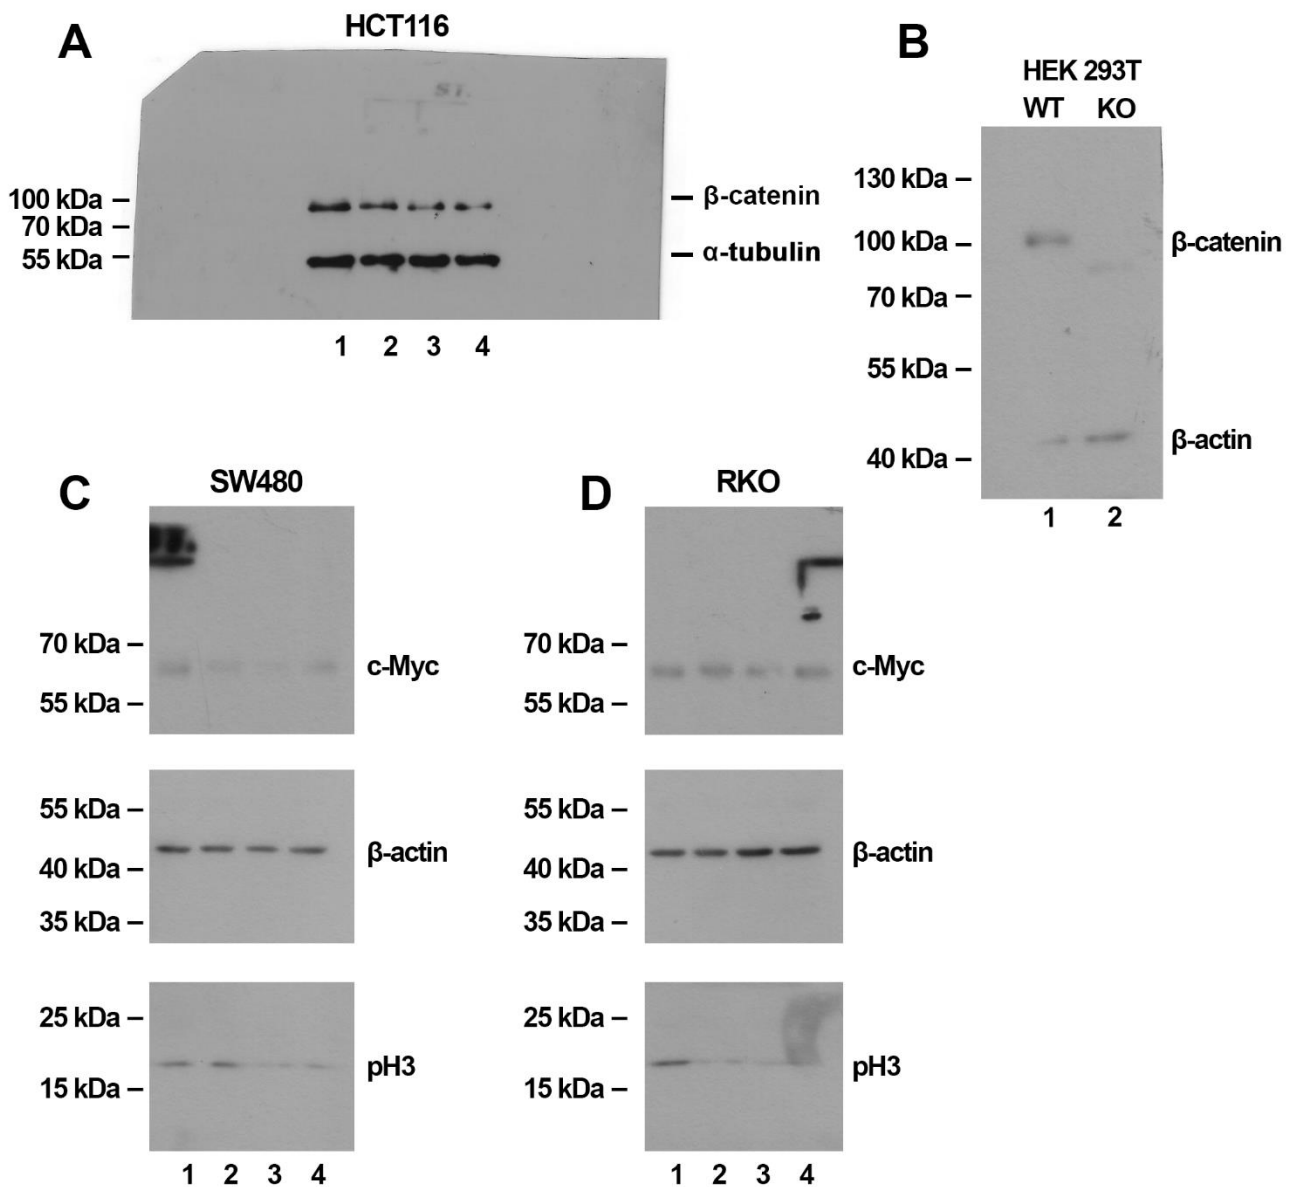

**Supplementary Figure S4: Raw immunoblot data.**

(A) Raw immunoblot data from HCT116 cell lysate shown in Figure 2. 1: Untreated; 2: DMSO; 3: 50 $\mu$ M piperine; 100 $\mu$ M piperine. (B) Raw immunoblot data from HEK293T cell lysate shown in Figure S1. 1: HEK293T WT, 2: HEK293T CTNNB1 KO. Raw immunoblot data from (C) SW480 or (D) RKO cell lysate shown in Figure 5: 1: DMSO; 2: 50 $\mu$ M piperine; 3: 100 $\mu$ M piperine; 4: 10 $\mu$ M XAV939. Anti- $\beta$ -catenin (1:1000, Sigma, C2206), anti- $\alpha$ -tubulin (1:1000, Sigma, T5168), anti-c-Myc (1:1000, CST, #5605), anti-phospho Histone-H3 (1:1000, CST, #3377), anti- $\beta$ -actin (1:2000, SCBT, sc-47778).

| Peak n# | Retention Time (min) | Area     | Height  | Area (%) | Height (%) |
|---------|----------------------|----------|---------|----------|------------|
| 1       | 1.816                | 1128     | 184     | 0.004    | 0.005      |
| 2       | 3.227                | 1607     | 198     | 0.005    | 0.005      |
| 3       | 4.118                | 19044    | 2089    | 0.062    | 0.053      |
| 4       | 4.985                | 204042   | 23941   | 0.666    | 0.613      |
| 5       | 5.681                | 1686     | 204     | 0.005    | 0.005      |
| 6       | 7.149                | 30283620 | 3868230 | 98.788   | 98.964     |
| 7       | 7.967                | 26178    | 2823    | 0.085    | 0.072      |
| 8       | 8.366                | 106734   | 10196   | 0.348    | 0.261      |
| 9       | 10.362               | 6370     | 486     | 0.021    | 0.012      |
| 10      | 11.732               | 1769     | 158     | 0.006    | 0.004      |
| 11      | 12.430               | 2877     | 205     | 0.009    | 0.005      |
| Total   |                      | 30655056 | 3908714 | 100.000  | 100.000    |

**Supplementary Table S1: Peak table of piperine HPLC analysis.**
